# Supplementary material
Source: HighWire-hosted journal article supplement (https://cmajopen.ca/highwire/filestream/85470/field_highwire_adjunct_files/2/2020-0099-3-at.pdf)
Supplement: 2020-0099-3-at.pdf [file 2020-0099-3-at.pdf]

A.

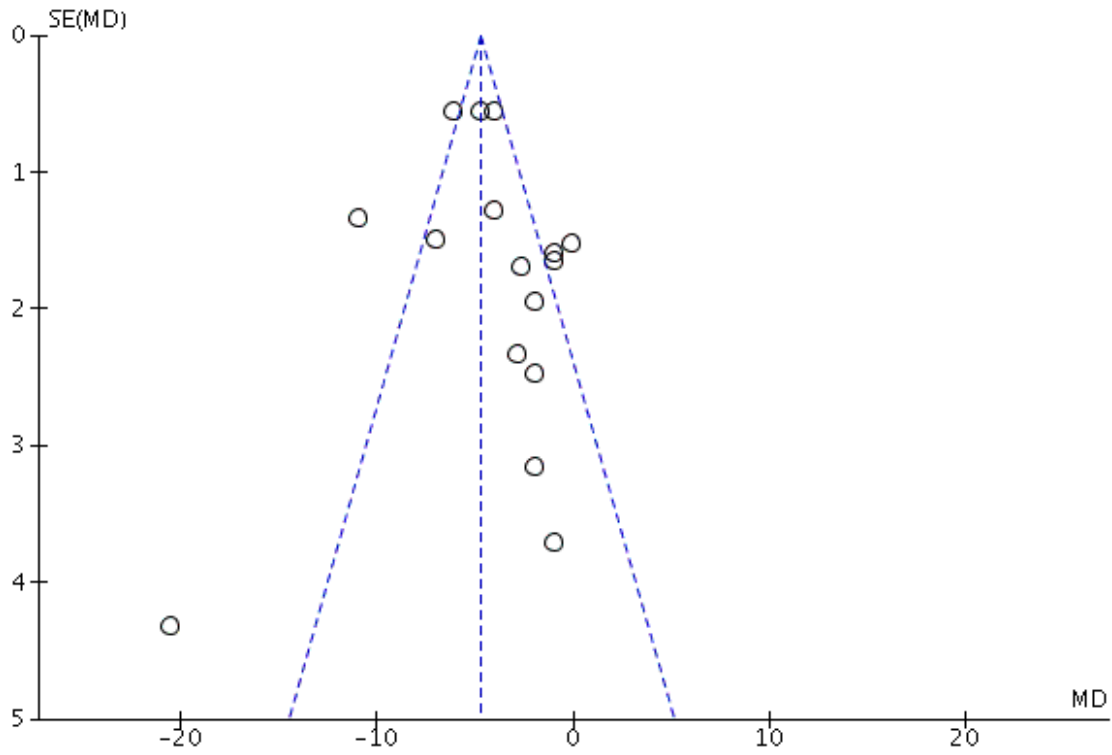

B.

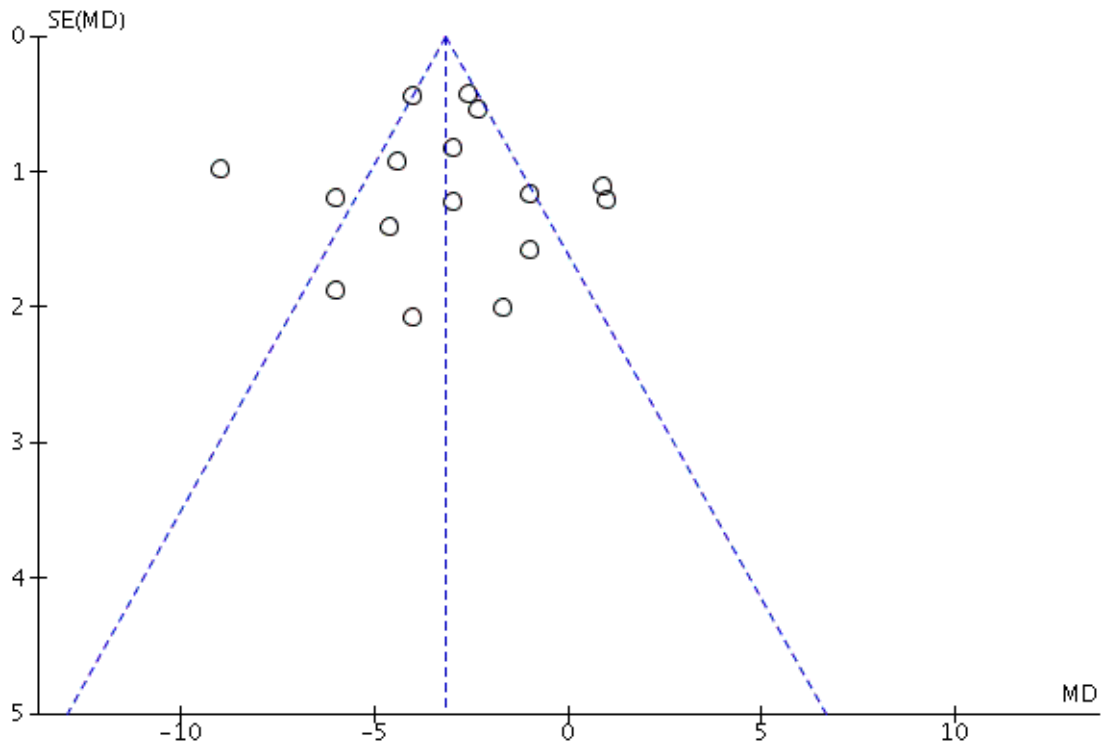

Funnel plot of studies assessing (A) systolic blood pressure (SBP) and (B) diastolic blood pressure (DBP) in the third trimester between home and office blood pressure measurements in pregnancy. The horizontal axis shows mean difference (MD), calculated as home blood pressure minus office blood pressure (mm Hg); the vertical axis shows the standard error (SE) of the mean difference.
